# Supplementary material for: Effect of Shock Waves on the Growth of <em>Aspergillus niger</em> Conidia: Evaluation of Germination and Preliminary Study on Gene Expression
Source: Preprints.org preprint supplement (doi:10.20944/preprints202208.0455.v1), 2022-08-26
Supplement: Supplementary file 1 [file supplementary]

## Supplementary Materials

### JOURNAL OF FUNGI

#### **Effect of shock waves on the growth of *Aspergillus niger* conidia: evaluation of germination and preliminary study on gene expression**

**Daniel Larrañaga<sup>1</sup>, Miguel A. Martínez-Maldonado<sup>2</sup>, Blanca E. Millán-Chiu<sup>3</sup>, Francisco Fernández<sup>2</sup>, Eduardo Castaño-Tostado<sup>4</sup>, Miguel A. Gómez-Lim<sup>5</sup>, Achim M. Loske<sup>2</sup>**

<sup>1</sup> Posgrado en Ciencia e Ingeniería de Materiales, Centro de Física Aplicada y Tecnología Avanzada, Universidad Nacional Autónoma de México, Blvd. Juriquilla 3001, 76230, Querétaro, Qro., Mexico

<sup>2</sup> Centro de Física Aplicada y Tecnología Avanzada, Universidad Nacional Autónoma de México, Blvd. Juriquilla 3001, 76230, Querétaro, Qro., Mexico

<sup>3</sup> CONACyT - Centro de Física Aplicada y Tecnología Avanzada, Universidad Nacional Autónoma de México, Blvd. Juriquilla 3001, 76230, Querétaro, Qro., Mexico

<sup>4</sup> Facultad de Química, Universidad Autónoma de Querétaro, C.U., Cerro de las Campanas s/n, 76010, Querétaro, Qro., Mexico

<sup>5</sup> Centro de Investigación y Estudios Avanzados del Instituto Politécnico Nacional, Unidad Irapuato, Km 9.6 Libramiento Norte Carretera Irapuato-León, 36824, Irapuato, Gto., Mexico

Corresponding author:

Blanca E. Millán-Chiu

E-mail address: [blanca.millan@fata.unam.mx](mailto:blanca.millan@fata.unam.mx)

Tel.: +52 (442) 192 6126

Fax: +52 (442) 2381165

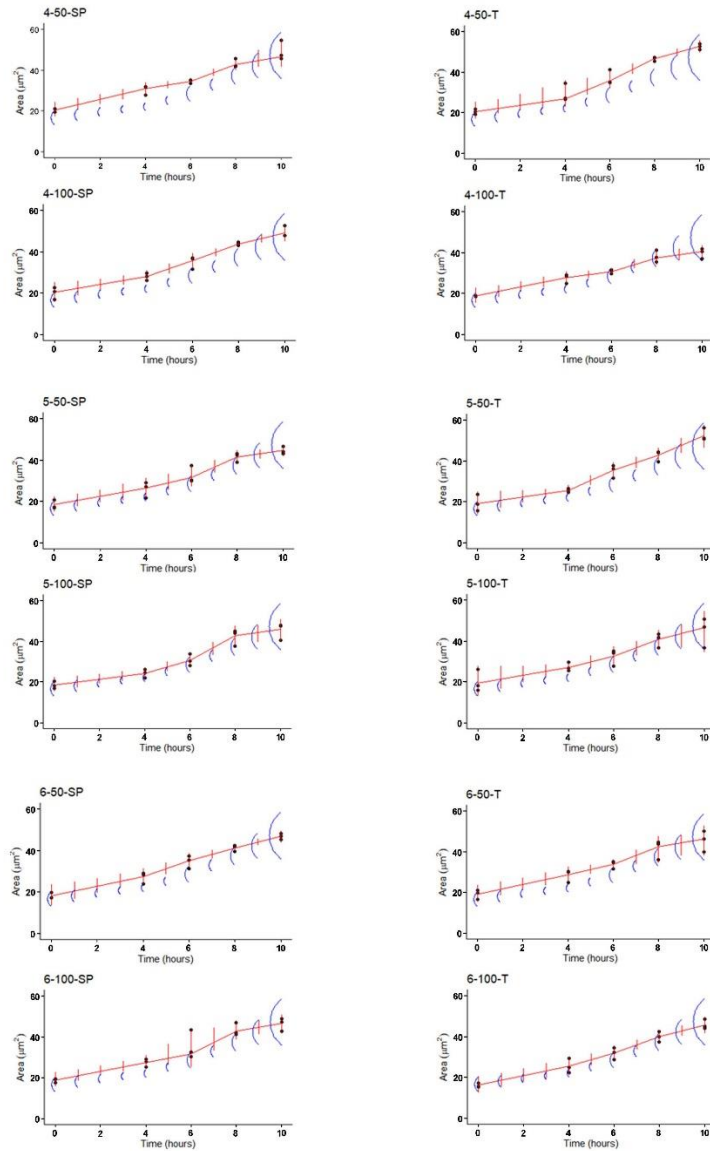

**Figure S1** Swelling of conidia versus time after exposure to 50 and 100 single-pulse (SP) shock waves generated at 4 kV, 5 kV, 6 kV, and to 25 and 50 tandem (T) events (50 and 100 shock waves, respectively) generated at 4 kV, 5 kV, 6 kV. Dots indicate the average of 100 conidia measured, vertical lines represent 95% bootstrap intervals of the growth of shock wave-treated conidia, and arcs refer to the 95% bootstrap interval of the control experimental groups. Overlapping intervals indicate a nonsignificant difference.

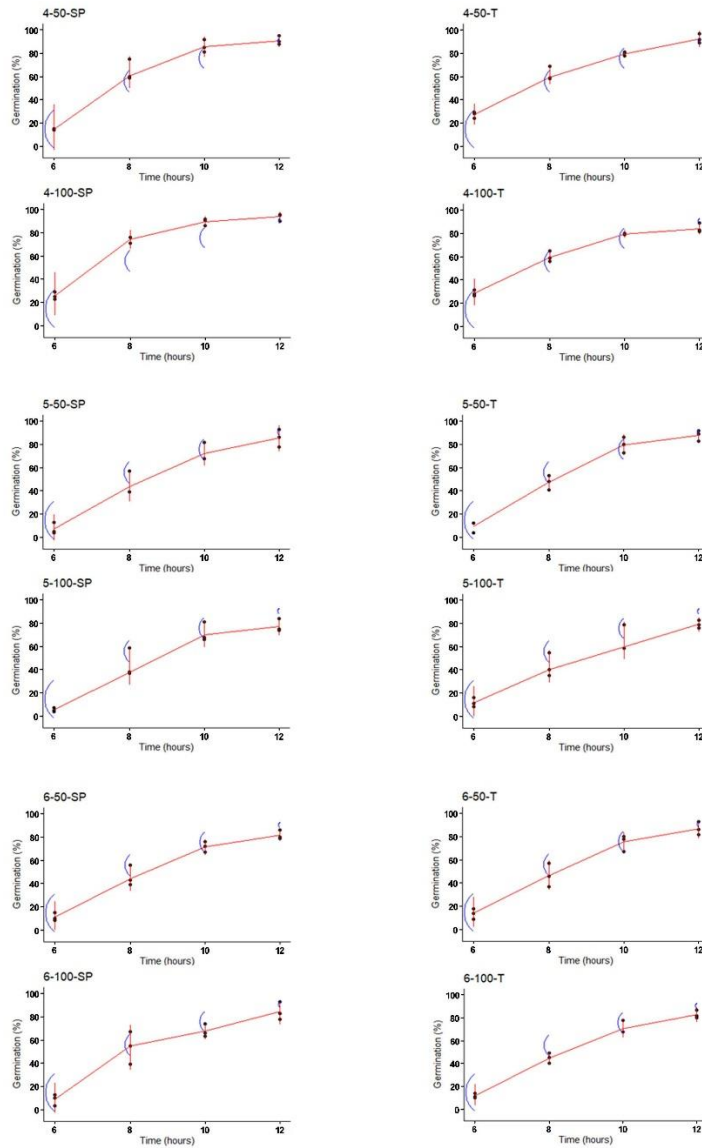

**Figure S2** Percentage of conidia that formed a germ tube after being exposed to 50 and 100 single-pulse (SP) shock waves generated at 4 kV, 5 kV, 6 kV, and to 25 and 50 tandem (T) events (50 and 100 shock waves, respectively), generated at 4 kV, 5 kV, 6 kV. Dots indicate the average of 100 conidia measured, vertical lines represent 95% bootstrap intervals of the growth of shock wave-treated conidia, and arcs refer to the 95% bootstrap interval of the control experimental groups. Overlapping intervals indicate a nonsignificant difference.
